# Supplementary material
Source: Springer Nature journal article supplement (https://www.springermedizin.de/resource/supplementary/13058_2007_1946_MOESM3_ESM.pdf/9700280)

## SUM159

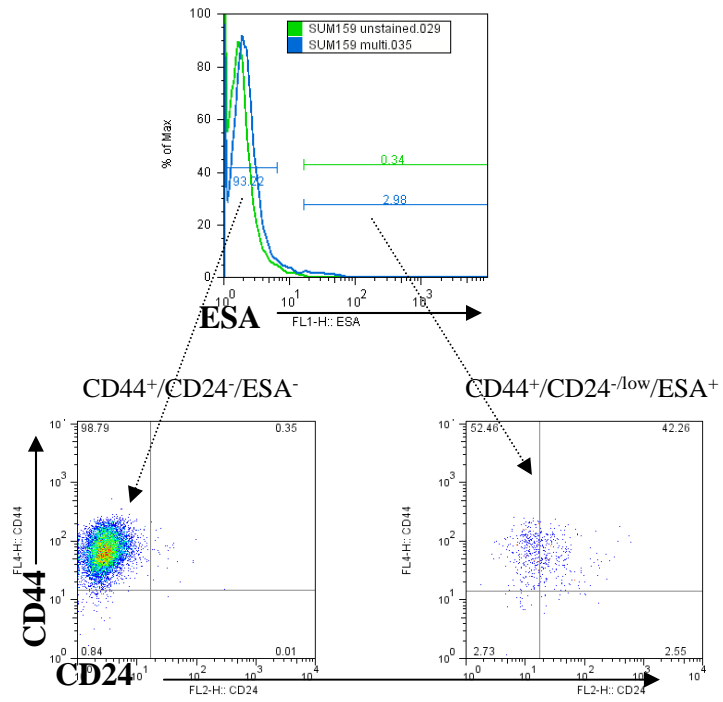

## SUM149

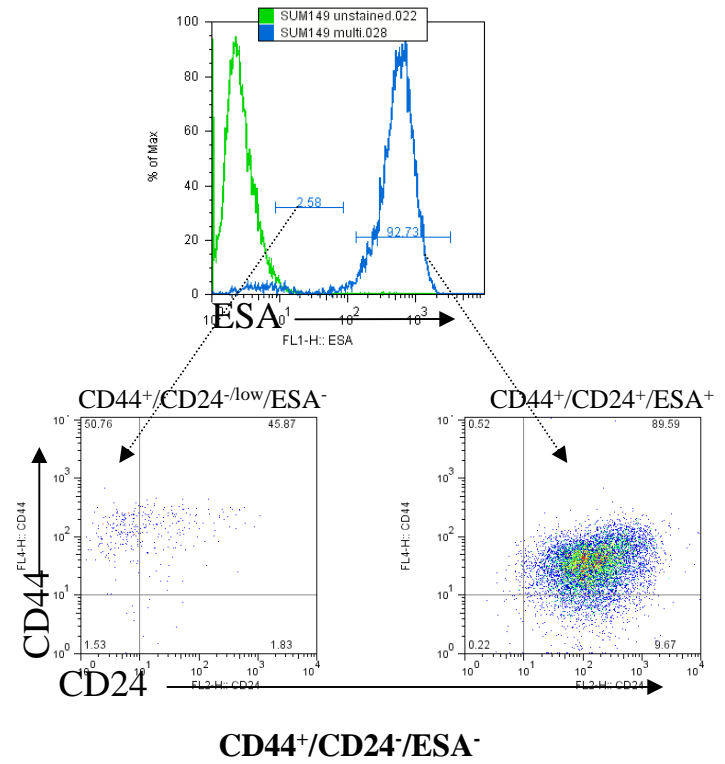

Supplement: MOESM3 [file 9700280]
